# Supplementary material for: A stratified phase I dose escalation trial of hypofractionated radiotherapy followed by ipilimumab in metastatic melanoma: long-term follow-up and final outcomes
Source: PubMed Central journal article supplement — Oncoimmunology. 2021 Jan 31;10(1):1863631. doi: 10.1080/2162402X.2020.1863631 (PMC7872096; doi:10.1080/2162402x.2020.1863631), 2021-01-31
Supplement: KONI_A_1863631_SM2822.pdf [file KONI_A_1863631_SM2822.pdf]

**Supplemental Table 1**

| Pt. # | Site irradiated           | Prior therapy                                      | Stratum | Dose     | # ipi cycles | Best local response (CT) | Best distant response (CT) | Best local response (PET) | Best distant best response (PET) | Time to progression on from RT (months) | Reason taken off study | PD-L1 status | Therapy at progression after RT/ipi                     | Current status      | Time from RT to last f/u or death (months) |
|-------|---------------------------|----------------------------------------------------|---------|----------|--------------|--------------------------|----------------------------|---------------------------|----------------------------------|-----------------------------------------|------------------------|--------------|---------------------------------------------------------|---------------------|--------------------------------------------|
| 1     | Lung                      | none                                               | 1       | 8 Gy x 2 | 5            | PD                       | SD                         | CMR                       | PMD                              | 9.8                                     | N/A                    | ND           | SBRT to new lung lesion; resection of brain met; pembro | Alive; SD on pembro | 106.8                                      |
| 2     | Abdominal node            | TMZ; carbo/paclitaxel                              | 2       | 6 Gy x 2 | 4            | N/A                      | PD*                        | N/A                       | N/A                              | 3.1                                     | Patient wish           | +            | none                                                    | DOD                 | 4.5                                        |
| 3     | Lung                      | TMZ; carbo/paclitaxel                              | 1       | 8 Gy x 2 | 4            | PR                       | PD                         | CMR                       | PMD                              | 1.4                                     | N/A                    | +            | none                                                    | DOD                 | 7.1                                        |
| 4     | Soft tissue mass, gluteal | dacarbazine, vemurafenib, prior RT to pancreas     | 2       | 6 Gy x 2 | 4            | PR                       | PR (68%)                   | PMR                       | PMR                              | 7.9                                     | N/A                    | —            | none                                                    | DOD                 | 12.0                                       |
| 5     | Axillary nodal mass       | none                                               | 2       | 6 Gy x 2 | 4            | SD                       | PD                         | PMR                       | PMD                              | 3.2                                     | N/A                    | ND           | pembro                                                  | DOD                 | 10.7                                       |
| 6     | Lung                      | TACE, TMZ, carbo/paclitaxel, mTOR inhib, HCQ       | 1       | 8 Gy x 2 | 4            | PD                       | PD                         | N/A                       | N/A                              | 2.6                                     | Prog.                  | ND           | none                                                    | DOD                 | 4.6                                        |
| 7     | Lung                      | none                                               | 1       | 8 Gy x 2 | 3            | PD                       | PD                         | N/A                       | N/A                              | 2.0                                     | Prog.                  | +            | none                                                    | DOD                 | 2.7                                        |
| 8     | Lung                      | treme/CD40 agonist                                 | 1       | 8 Gy x 2 | 4            | SD                       | PD                         | CMR                       | PMD                              | 5.4                                     | N/A                    | —            | pembro                                                  | Alive; SD on pembro | 36.7                                       |
| 9     | Lung                      | BRAF/MEK inhibitor                                 | 1       | 8 Gy x 2 | 4            | PD                       | SD                         | PMR                       | PMD                              | 4.9                                     | N/A                    | ND           | pembro                                                  | DOD                 | 10.7                                       |
| 10    | Liver                     | none                                               | 2       | 6 Gy x 2 | 3            | SD                       | PR (30%)                   | CMR                       | CMR                              | N/A                                     | Toxicity               | ND           | none                                                    | Alive; NED          | 96.1                                       |
| 11    | Liver                     | none                                               | 2       | 6 Gy x 2 | 3            | SD                       | PD                         | SMD                       | PMD                              | 7.9                                     | Toxicity               | —            | pembro                                                  | DOD                 | 37.9                                       |
| 12    | Soft tissue               | Prior RT (axilla), BRAF/MEK inhibitor, vemurafenib | 2       | 6 Gy x 2 | 3            | PR                       | PD                         | N/A                       | N/A                              | 2.9                                     | Prog.                  | +            | none                                                    | DOD                 | 3.8                                        |
| 13    | Lung                      | none                                               | 1       |          | 2            | N/A                      | PD*                        | N/A                       | N/A                              | 1.4                                     | Prog                   |              | none                                                    | DOD                 | 4.9                                        |

|    |                     |                       |   |             |   |    |          |     |     |      |      |    |                                                                           |                               |      |
|----|---------------------|-----------------------|---|-------------|---|----|----------|-----|-----|------|------|----|---------------------------------------------------------------------------|-------------------------------|------|
|    |                     |                       |   | 8 Gy<br>x 3 |   |    |          |     |     |      |      | –  |                                                                           |                               |      |
| 14 | Soft tissue         | BRAF/MEK inhibitor    | 2 | 6 Gy<br>x 3 | 4 | SD | PD       | SMD | PMD | 2.8  | N/A  | –  | pembro                                                                    | DOD                           | 6.1  |
| 15 | Axillary nodal mass | none                  | 2 | 6 Gy<br>x 3 | 4 | SD | PR (59%) | SMD | CMR | 6.1  | N/A  | –  | pembro                                                                    | DOD                           | 9.8  |
| 16 | Lung                | none                  | 1 | 8 Gy<br>x 3 | 4 | PR | PR (46%) | N/A | N/A | 12.2 | N/A  | ND | GammaKnife and resection of brain mets; then pembro                       | Alive; SD on pembro           | 91.5 |
| 17 | Axillary nodal mass | prior RT (lower back) | 2 | 6 Gy<br>x 3 | 4 | SD | PD       | PMR | PMD | 3.3  | N/A  | –  | pembro; then progressed in breast; mastectomy; placed on B-raf inhibitors | Alive; SD on B-Raf inhibitors | 89.2 |
| 18 | Inguinal nodal mass | none                  | 2 | 6 Gy<br>x 3 | 4 | SD | SD       | PMR | PMR | 6.3  | N/A  | –  | pembro                                                                    | DOD                           | 32.5 |
| 19 | Liver               | vemurafenib           | 2 | 6 Gy<br>x 3 | 2 | SD | PD       | N/A | N/A | 3.8  | Prog | –  | none                                                                      | DOD                           | 4.9  |
| 20 | Lung                | TMZ                   | 1 | 8 Gy<br>x 3 | 4 | CR | SD       | N/A | N/A | 7.6  | N/A  | ND | pembro                                                                    | Alive; SD on pembro           | 24.9 |
| 21 | Sclav nodal mass    | vemurafenib           | 2 | 6 Gy<br>x 3 | 3 | CR | PD       | N/A | N/A | 2.3  | Prog | ND | none                                                                      | DOD                           | 4.5  |
| 22 | Lung                | none                  | 1 | 8 Gy<br>x 3 | 4 | PR | PR (77%) | N/A | N/A | 12.3 | N/A  | ND | pembro                                                                    | Alive; SD on pembro           | 57.6 |

PR- partial response  
PD- progressive disease  
CR – complete response  
SD – stable disease

PMR- partial metabolic response  
PMD- progressive metabolic disease  
SMD- stable metabolic disease  
CMR- complete metabolic response

\* PD based on new sites of metastases

TMZ- temozolomide                      N/A not applicable

ND – not done

TACE - Transcatheter arterial chemoembolization

HCQ – hydroxychloroquine

treme - Tremelimumab

Supplemental Table 2

|                                                                        | Stratum 2<br>DL1 (6 Gy x 2) |            | Stratum 1<br>DL1 (8 Gy x 2) |          | Stratum 2<br>DL2 (6 Gy x 3) |          | Stratum 1<br>DL2 (8 Gy x 3) |          | All groups |
|------------------------------------------------------------------------|-----------------------------|------------|-----------------------------|----------|-----------------------------|----------|-----------------------------|----------|------------|
|                                                                        | Grades<br>1-2               | Grade<br>3 | Grades<br>1-2               | Grade 3  | Grades<br>1-2               | Grade 3  | Grades 1-<br>2              | Grade 3  |            |
| <b>Any adverse event</b>                                               | <b>43</b>                   | <b>6</b>   | <b>34</b>                   | <b>5</b> | <b>30</b>                   | <b>3</b> | <b>13</b>                   | <b>1</b> | <b>135</b> |
| <b>Any treatment-related<br/>adverse event</b>                         | <b>13</b>                   | <b>1</b>   | <b>6</b>                    | <b>2</b> | <b>7</b>                    |          | <b>2</b>                    |          | <b>31</b>  |
| <b>Specific treatment-<br/>related adverse<br/>events (immune)</b>     |                             |            |                             |          |                             |          |                             |          |            |
| Anaphylaxis (with<br>hypotension and<br>angioedema)                    |                             |            |                             | 1        |                             |          |                             |          | 1          |
| Arthralgia (flare of<br>rheumatoid arthritis)                          |                             |            |                             |          | 1                           |          |                             |          | 1          |
| Colitis*                                                               | 1                           | 1          |                             |          |                             |          |                             |          | 2          |
| Pruritus                                                               | 4                           |            | 1                           |          | 1                           |          | 1                           |          | 7          |
| Rash                                                                   | 2                           |            | 2                           |          |                             |          |                             |          | 4          |
| Uveitis                                                                | 1                           |            |                             |          |                             |          |                             |          | 1          |
| <b>Specific treatment-<br/>related adverse<br/>events (non-immune)</b> |                             |            |                             |          |                             |          |                             |          |            |
| Abdominal Pain                                                         | 1                           |            |                             |          |                             |          |                             |          | 1          |
| Anorexia                                                               | 1                           |            | 1                           |          |                             |          |                             |          | 2          |
| Chills                                                                 |                             |            |                             |          | 1                           |          |                             |          | 1          |
| Dermatitis (radiation)                                                 |                             |            |                             |          | 1                           |          |                             |          | 1          |
| Diaphoresis                                                            | 1                           |            |                             |          |                             |          |                             |          | 1          |
| Diarrhea*                                                              |                             |            |                             |          | 1                           |          |                             |          | 1          |
| Fatigue                                                                | 1                           |            |                             | 1        | 1                           |          |                             |          | 3          |
| Headache                                                               |                             |            | 1                           |          |                             |          |                             |          | 1          |

|                                                      |           |          |           |          |           |          |           |          |            |
|------------------------------------------------------|-----------|----------|-----------|----------|-----------|----------|-----------|----------|------------|
| Nausea                                               | 1         |          | 1         |          | 1         |          | 1         |          | 4          |
| <b>Any non-treatment-related adverse event</b>       | <b>30</b> | <b>5</b> | <b>28</b> | <b>3</b> | <b>23</b> | <b>3</b> | <b>11</b> | <b>1</b> | <b>104</b> |
| <b>Specific non-treatment-related adverse events</b> |           |          |           |          |           |          |           |          |            |
| Abdominal pain                                       | 2         |          | 3         |          | 2         |          |           |          | 7          |
| Anemia                                               |           | 2        |           | 1        |           | 1        |           |          | 4          |
| Anorexia                                             | 2         |          |           |          | 1         |          |           |          | 3          |
| Arthralgia                                           |           |          |           |          | 1         |          |           |          | 1          |
| Ascites                                              |           |          | 1         |          |           |          |           |          | 1          |
| Bone pain                                            | 1         |          | 2         |          | 1         |          | 1         |          | 5          |
| Cholecystitis                                        |           | 1        |           |          |           |          |           |          | 1          |
| Chills                                               |           |          |           |          | 1         |          |           |          | 1          |
| Chest pain                                           |           |          |           |          | 1         |          | 1         |          | 2          |
| Constipation                                         |           |          | 1         |          | 1         |          | 1         |          | 3          |
| Cough                                                | 2         |          | 2         |          |           |          | 1         |          | 5          |
| Dehydration                                          |           |          |           |          | 2         |          |           |          | 2          |
| Depression                                           | 2         |          |           |          | 1         |          |           |          | 3          |
| Dermatitis                                           |           |          | 1         |          |           |          |           |          | 1          |
| Diarrhea                                             | 1         |          | 1         |          |           |          |           |          | 2          |
| Dyspepsia                                            |           |          |           |          |           |          | 1         |          | 1          |
| Dyspnea                                              | 2         |          | 1         | 1        | 1         |          |           |          | 5          |
| Erythema                                             | 1         |          | 1         |          |           |          |           |          | 2          |
| Esophagitis                                          | 1         |          |           |          |           |          |           |          | 1          |
| Fatigue                                              | 2         |          | 2         |          | 1         | 1        |           |          | 6          |
| Fever                                                |           |          |           |          | 1         |          | 1         |          | 2          |
| Flank pain                                           | 2         |          |           |          |           |          |           |          | 2          |
| Gait disturbance                                     | 1         |          |           |          |           |          |           |          | 1          |
| Gastric hemorrhage                                   | 1         | 1        |           |          | 1         |          |           |          | 3          |
| GE reflux                                            |           |          | 1         |          | 1         |          |           |          | 2          |
| Genital edema                                        |           |          | 1         |          |           |          |           |          | 1          |
| Headache                                             | 1         |          | 1         |          | 1         |          |           |          | 3          |

|                                        |   |   |   |  |   |   |   |   |   |
|----------------------------------------|---|---|---|--|---|---|---|---|---|
| Hematuria (2o urinary tract infection) |   |   | 1 |  |   |   |   |   | 1 |
| Hemoptysis                             |   |   | 1 |  |   |   |   |   | 1 |
| Hoarseness                             | 1 |   |   |  |   |   |   |   | 1 |
| Insomnia                               |   |   | 2 |  |   |   |   |   | 2 |
| Leukocytosis                           |   |   |   |  |   | 1 |   |   | 1 |
| Limb edema                             |   |   | 1 |  |   |   |   |   | 1 |
| Nausea                                 | 1 |   | 1 |  | 1 |   | 1 |   | 4 |
| Neck Swelling                          |   |   |   |  |   |   | 1 |   | 1 |
| Nocturia                               |   |   | 1 |  |   |   |   |   | 1 |
| Oral Pain                              | 1 |   |   |  |   |   |   |   | 1 |
| Peripheral neuropathy                  |   |   |   |  |   |   | 1 |   | 1 |
| Pneumonia                              |   |   |   |  | 1 |   | 1 |   | 2 |
| Pneumothorax                           |   |   |   |  |   |   |   | 1 | 1 |
| Postnasal drip                         |   |   | 1 |  |   |   |   |   | 1 |
| Pruritis                               |   |   |   |  | 1 |   |   |   | 1 |
| Rash                                   | 1 |   |   |  |   |   |   |   | 1 |
| Scalp pain                             | 1 |   |   |  |   |   |   |   | 1 |
| Sinusitis                              |   |   |   |  | 1 |   | 1 |   | 2 |
| Superficial thrombophlebitis           | 1 |   |   |  |   |   |   |   | 1 |
| Throat pain                            | 1 |   |   |  |   |   |   |   | 1 |
| Vomiting                               | 1 |   |   |  | 1 |   |   |   | 2 |
| Weight loss                            |   | 1 | 1 |  |   |   |   |   | 2 |
| Wound infection                        |   |   |   |  | 1 |   |   |   | 1 |
| Upper respiratory infection            | 1 |   |   |  |   |   |   |   | 1 |
| Urinary frequency                      |   |   |   |  | 1 |   |   |   | 1 |
| Urinary tract infection                |   |   | 1 |  |   |   |   |   | 1 |

\* Diarrhea was defined as a disorder characterized by frequent and watery bowel movements; colitis was defined as a disorder characterized by inflammation of the colon.
